# Supplementary material
Source: publisher figshare collection journal article supplement (https://karger.figshare.com/ndownloader/files/33079565)
Supplement: Supplementary file 1 [file 33079565]

**Supplementary Figure 1:** Publication bias and sensitivity analysis

| **Publication bias** | |
| --- | --- |
| a. Polypharmacy | b. Hyperpolypharmacy |
| 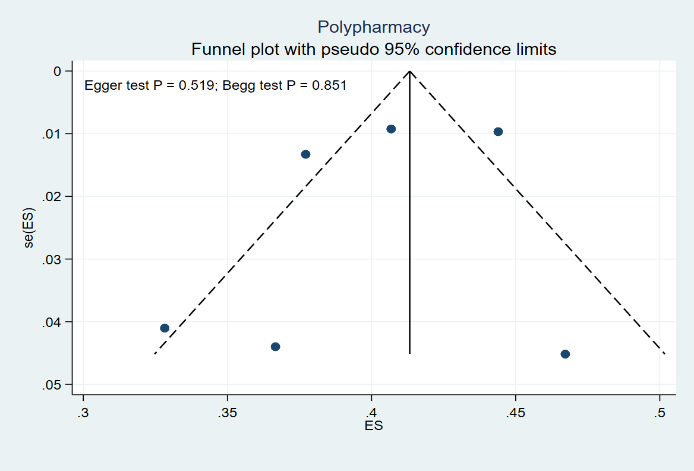 | 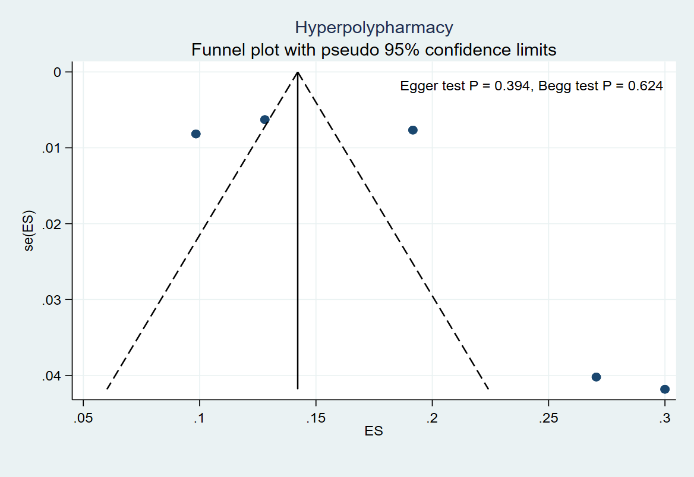 |
| **Sensitivity analysis** | |
| c. Polypharmacy | d. Hyperpolypharmacy |
| 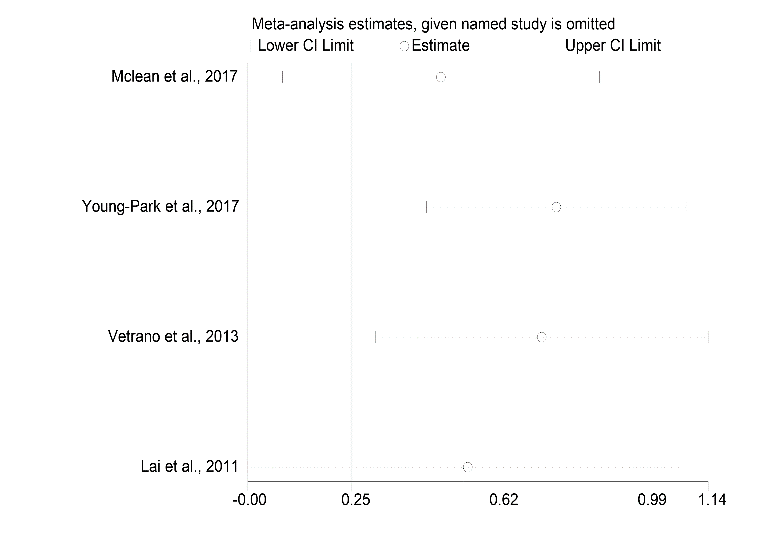 | 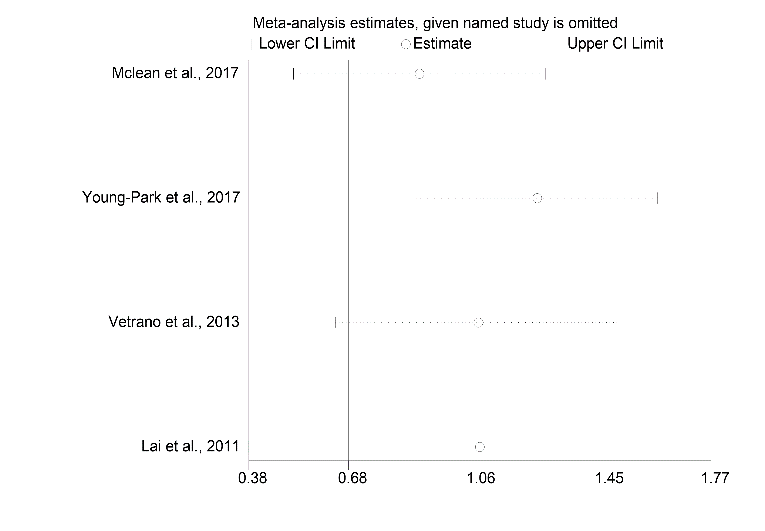 |
